# Supplementary material
Source: Springer Nature journal article supplement (https://www.springermedizin.de/resource/supplementary/13063_2011_1000_MOESM1_ESM.pdf/9619622)

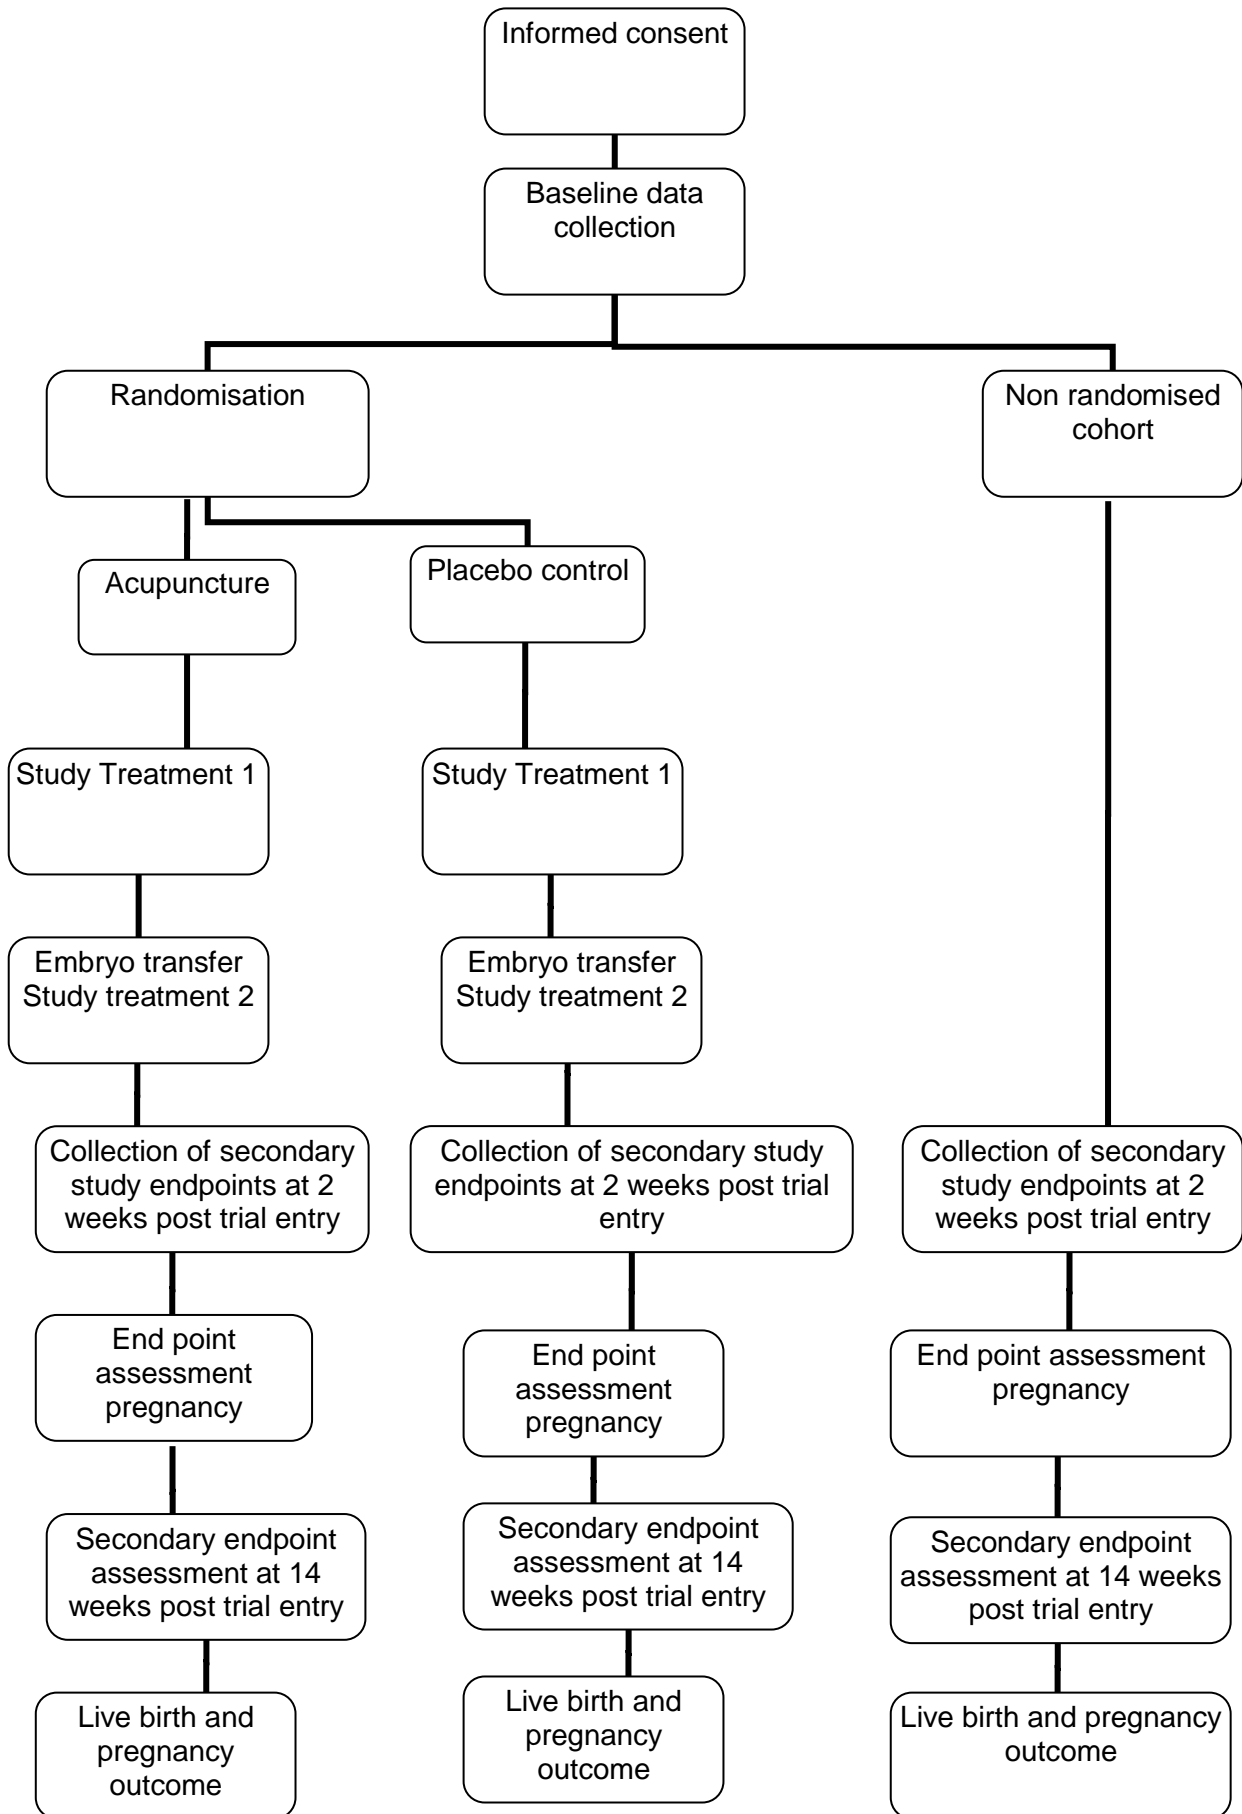

Supplement: MOESM1 [file 9619622]
